# Supplementary material for: Experiences and Needs regarding Nutrition Information and Nutritional Supplements among Oncology Healthcare Professionals: A Sequential Exploratory Mixed-methods Study
Source: Research Square preprint supplement (doi:10.21203/rs.3.rs-8549682/v1), 2026-02-12
Supplement: Supplementary file 1 [file e7408bab82940bff1ebed8cf.docx]

**Appendix 1 – Interview guide**

Introduction: You are being asked to participate in an interview study. First, thank you for taking the time to participate in this study. The aim of this study is to acquire a comprehensive understanding of the experiences and needs of HCPs regarding the provision of uniform information on nutrition and nutritional supplements to adult cancer patients. We will ask you questions, and you may choose not to answer at any time.

Some practical information:

- One researcher will conduct the interview, while another researcher will act as an observer, monitoring time and asking additional questions if necessary.
- We will adhere to the “Dutch Code of Conduct for Scientific Integrity” and ensure the confidentiality of your data.
- During the interview, you may indicate at any time that you wish to stop.
- The interview will be recorded using audio equipment.

If you agree, I would like to ask you to sign the “Informed Consent” document. When you sign this form, you are giving permission for us to use the information you provide during this interview.

Topiclist

- Demographic characteristics
  - Function
  - Age
  - Profession
  - Department
  - Years of experience
- Experiences nutrition and nutritional supplement advice
  - How do you experience providing advice on nutrition and nutritional supplements?
  - How do you perceive questions related to nutrition and nutritional supplements?
    - About what?
    - When?
    - How?
    - Patient initiative?
    - Barriers
- Knowledge nutrition and nutritional supplement advice
  - How do you perceive the extent of your knowledge regarding nutrition? And what about nutritional supplements?
    - Source of information
    - Sufficient / insufficient knowledge
- Factors related to protocols and guidelines
  - Do you use protocols or guidelines when providing nutrition and nutritional supplement advice?
    - Which?
  - Other sources of knowledge
- Organizational factors
  - Is there any consultation or meeting within the department regarding the provision of advice?
    - Internal discussions
    - Uniform or non-uniform approach?
      - How?
    - Responsibility
    - Needs regarding nutrition and nutritional supplement advice

Is there anything else you would like to add or comment?

Thank you so much for your time and effort. You provided us with useful information.
